# Supplementary material for: Sex-Specific Regulatory Systems for Dopamine Production in the Honey Bee
Source: MDPI journal article supplement (doi:10.3390/insects13020128), 2022-01-25
Supplement: s1 [file s1]

Table S1. Mean values of monoamine levels and the ratios in the brains of workers and males under control and tyrosine-fed condition.

| Monoamine                | Worker (8 days)     |                       |                        |                  | Male (8 days)             |                           |                        |        |
|--------------------------|---------------------|-----------------------|------------------------|------------------|---------------------------|---------------------------|------------------------|--------|
|                          | Control             | Tyrosine-fed (1mg/mL) | Tyrosine-fed / Control | Notes            | Control                   | Tyrosine-fed (1mg/mL)     | Tyrosine-fed / Control | Notes  |
| DOPA                     | 0.828 pmol / brain  | 1.571 pmol / brain    | 1.90                   | unpublished data | 4.476 pmol / protein mg   | 13.576 pmol / protein mg  | 3.03                   | Ref. 3 |
|                          |                     |                       |                        |                  |                           |                           |                        |        |
| Dopamine                 | 21.084 pmol / brain | 60.770 pmol / brain   | 2.88                   | Ref. 1           | 17.678 pmol / brain       | 39.063 pmol / brain       | 2.21                   | Ref. 2 |
|                          | 16.384 pmol / brain | 34.548 pmol / brain   | 2.11                   | Ref. 2           | 110.446 pmol / protein mg | 218.944 pmol / protein mg | 1.98                   | Ref. 3 |
|                          |                     |                       |                        |                  |                           |                           |                        |        |
| <i>N</i> -acetyldopamine | 14.750 pmol / brain | 35.247 pmol / brain   | 2.39                   | Ref. 1           | 13.754 pmol / brain       | 23.159 pmol / brain       | 1.68                   | Ref. 2 |
|                          | 8.094 pmol / brain  | 18.530 pmol / brain   | 2.29                   | Ref. 2           |                           |                           |                        |        |
|                          |                     |                       |                        |                  |                           |                           |                        |        |
| Tyramine                 | 2.187 pmol / brain  | 4.073 pmol / brain    | 1.86                   | Ref. 1           | 14.310 pmol / protein mg  | 12.651 pmol / protein mg  | 0.88                   | Ref. 3 |
|                          |                     |                       |                        |                  |                           |                           |                        |        |
| Octopamine               | 2.226 pmol / brain  | 2.068 pmol / brain    | 0.93                   | Ref. 1           | no data                   | no data                   | -                      |        |
|                          |                     |                       |                        |                  |                           |                           |                        |        |
| <i>N</i> -acetyltyramine | 9.971 pmol / brain  | 12.478 pmol / brain   | 1.25                   | Ref. 1           | no data                   | no data                   | -                      |        |

Ref. 1: Matsuyama et al. (2015); Ref. 2: Sasaki (2016); Ref. 3: Watanabe and Sasaki (2021)
